# Supplementary material
Source: PubMed Central journal article supplement (PMC4076127)
Supplement: 10.3163.1536-5050.102.3.008.sg001.pdf [file 10.3163.1536-5050.102.3.008.sg001.pdf]

## How are medical students trained to locate biomedical information to practice evidence-based medicine? a review of the 2007–2012 literature

Lauren A. Maggio, MS(LIS), MA; Janice Y. Kung, MLIS

### APPENDIX

#### Search strategies

##### PubMed

(EBM OR “evidence based medicine” OR “evidence-based medicine” OR EBP OR “evidence based practice” OR “evidence-based practice”) AND (information storage and retrieval OR information literacy OR (literature OR database OR PubMed OR Medline AND search\*)) AND (education, medical OR students, medical OR “undergraduate medical education” OR “UGME” OR “UME”)

- Language: English
- Publication Year: 2007–current

##### Scopus

ALL((EBM OR “evidence based medicine” OR “evidence-based medicine” OR EBP OR “evidence based practice” OR “evidence-based practice”) AND (information storage and retrieval OR information literacy OR (literature OR database OR PubMed OR Medline AND search\*)) AND (education, medical OR students, medical OR “undergraduate medical education” OR “UGME” OR “UME”)) AND LANGUAGE(English) AND PUBYEAR AFT 2007

##### Web of Science

TS=((EBM OR “evidence based medicine” OR evidence-based medicine OR EBP OR “evidence based practice” OR evidence-based practice) AND (information storage and retrieval OR ((literature OR database OR PubMed) AND search\*)) OR information literacy) AND (education, medical OR students, medical OR “undergraduate medical education” OR “UGME” OR “UME”))

- Language: English
- Publication Year: 2007–current

##### Cochrane Library (CCTR)

(EBM OR “evidence based medicine” OR “evidence-based medicine” OR EBP OR “evidence based practice” OR “evidence-based practice”) AND (information storage and retrieval OR information literacy OR (literature OR database OR PubMed OR Medline AND search\*)) AND (education, medical OR students, medical OR “undergraduate medical education” OR “UGME” OR “UME”)

**Educational Resource Information Center (ERIC), via EBSCO**

(EBM OR “evidence based medicine” OR evidence-based medicine OR EBP OR “evidence based practice” OR evidence-based practice) AND (information storage and retrieval OR ((literature OR database OR PubMed) AND search\*)) OR information literacy) AND (education, medical OR students, medical OR “undergraduate medical education” OR “UGME” OR “UME”)

- Language: English
- Publication Year: 2007–current

**ERIC, via Ovid**

▼ Search History (5 searches) (Click to close) View Saved

| <input type="checkbox"/> | # ▲ | Searches                                                     | Results | Search Type | Actions                                           |
|--------------------------|-----|--------------------------------------------------------------|---------|-------------|---------------------------------------------------|
| <input type="checkbox"/> | 2   | medical students/                                            | 3309    | Advanced    | Display <span style="float: right;">More »</span> |
| <input type="checkbox"/> | 3   | information retrieval/ or databases/ or information seeking/ | 16701   | Advanced    | Display <span style="float: right;">More »</span> |
| <input type="checkbox"/> | 4   | 1 and 2 and 3                                                | 24      | Advanced    | Display <span style="float: right;">More »</span> |
| <input type="checkbox"/> | 5   | limit 4 to (english language and yr="2002 -Current")         | 3       | Advanced    | Display <span style="float: right;">More »</span> |

Remove Selected | Save Selected | Combine selections with:    RSS
